# Supplementary material for: A chromatin-associated protein required for inducing and limiting meiotic DNA double-strand break formation
Source: PubMed Central journal article supplement (PMC6294514; doi:10.1093/nar/gky968), 2018-10-24
Supplement: gky968_supplemental_files.pdf [file gky968_supplemental_files.pdf]

Table S1. List of primers

| Purpose                           | Primer                | Sequence (5 → 3', Adaptors used for Gibson assembly are labeled in red) |
|-----------------------------------|-----------------------|-------------------------------------------------------------------------|
| <i>PARS11</i> knockout            | Pars11_5UTRf1199_Not1 | AGTTCTAGAGCGGCCGCCTTCTTTGCATTTATAAGATAACAAG                             |
|                                   | Pars11_5UTRr1862_N4   | GTCAGGTGCCTGGTACCCCTTCTTACTTCTGATTTTTTTAATC                             |
|                                   | Pars11_3UTRf3159_N4   | CTGACGTCGCACCATCCCTTTTTAGTTATATTTTTGTGGATTG                             |
|                                   | Pars11_3UTRr3801_Not1 | ACCGCGGTGGCGGCCGCTTACAAAGCTATTAATTGTGATTC                               |
| Pars11 C-terminal HA tagging      | Pars11_CDSf2468_Not1  | AGTTCTAGAGCGGCCGCATCAAGGCTAAATCATCCTAATC                                |
|                                   | Pars11_CDSr3125_HA    | GTCGGGGACGTCGTAGGGGTATCCATTATTTAAGTTTAGGTTGCCTTT                        |
|                                   | Pars11_3UTRf3126_HA   | CCCTACGACGTCCCCGACTACGCCCTGAATTTAATATCAATTATTTTTT                       |
|                                   | Pars11_3UTRr3569_N4   | GTCAGGTGCCTGGTACCCAATTCATATTAATAAAGGAAATTTG                             |
|                                   | Pars11_3UTRf3564_N4   | CTGACGTCGCACCATCCCTGAATTATAAATTCTAGATTTCTAAT                            |
|                                   | Pars11_3UTRr4151_Not1 | ACCGCGGTGGCGGCCGCAATAGCATTCAATATACTTTTTG                                |
| <i>PARS11</i> knockout validation | Pars11_Cdsqf2409      | CAAGAAAGTAAGGTCTCTTAATTTG                                               |
|                                   | Pars11_Cdsqr2745      | TAATTACATTGCTCTAGAAAAAGTG                                               |
| <i>ATR1</i> RNAi                  | ATR1_N5if7625_5F      | TAAACTTAAACATCCCGGGGGATCCATGAGCTAGATTAACACTTTTTAG                       |
|                                   | ATR1_N5ir8282_5R      | TTGCATATCCGTTACTTACGGATCCCTTAATTAGTTTCATTATGATCCTTG                     |
|                                   | ATR1_N5if7625_3F      | GCTGACCGATTTCAGTTCGCCTGCAGATGAGCTAGATTAACACTTTTTAG                      |
|                                   | ATR1_N5ir8282_3R      | TAAAAGAAGAATTCAAAGGCTGCAGTTAATTAGTTTCATTATGATCCTTG                      |
| Pars11-16A construct              | Pars11_16AQ_5UTRr912  | CTTCTTATTGATATATGTTTTTCAGACTCAT                                         |
|                                   | Pars11_16AQ_IDTf      | ATGAGTCTGAAAACATATATCAATAAGAAG                                          |
|                                   | Pars11_16AQ_IDTr      | TAAGCAATTTGTCCAACCATCAA                                                 |
|                                   | Pars11_16AQ_CDSf1514  | CTTGATGGTTGGACAAATTGCT                                                  |
| RT-PCR                            | 18s F                 | CCTGGGAAGGTACGGGTAAT                                                    |
|                                   | 18s R                 | AAGGTTCCACCAGACCATTTCG                                                  |

---

RT-PCR

Spo11\_cds2f2319

GCTAAAGGTTTAGTAACTGGTAATG

Spo11\_cds2r2668

TTTCCCAGTAATCATTATACAATTC

Sequence for *PARS11* 1-603 bp mutation

atg agt ctg aaa aca tat atc aat aag aag aaa gct taa aac tta ggt tct gct tag tca tcg  
gct gca gct ctc aca tca ctt tag tca aat tgc ttt aca gca aag gga taa atg gtt gct taa  
aat gct tag aac gct cag aat acc att caa atg cag tgc aat gct caa gct cag tag ata ctc  
gct caa ggt att tat ttt aat agt tca att tgt aat taa ttt aaa tat tta atc tct cag ctg ctt aat  
ttc ctg tgc cta aaa act cta gcc tta tga ttg aag aac caa ata tct ttg gat aaa ctg gat  
aca gct cat tca aaa ata aga acc taa att ctg ctt aga ata cat cct ttt taa att agt tag ctt  
aag acg aag cta atg att ctt aca att aaa ttc tac atg aga ata att tta ttt aaa atc cta atc  
tga act aaa gct ttc taa att aaa gct atc aac ttc ttg ctt agc ata acc taa agt aag ctc  
aat tgt ttc ttc cag cga tcc aag aaa gta agg tcg ctt aat ttg atg gta agt ctg ctt aga tat  
tta atc ctt ctg aat caa ggc taa atc atc cta atc tga tat aaa gta gct tga tgg ttg gac  
aaa ttg ct

---

Table S2

Frequency distribution of cytological stages in samples taken from *atr1i* cultures for PFGE from t=5 h, 6 h and 7 h after meiosis induction. Post-meiotic stages were largely absent at these timepoints. Therefore, post-meiotic DSBs cannot account for the DNA fragmentation seen.

| t   | Stages % | Pre-meiotic | Early prophase | Mid prophase | Late prophase<br>-metaphase I | Attempted<br>Anaphase I | Post-anaphase | RNAi escapers<br>(WT-like stages) | Sample size<br>(no. of nuclei) |
|-----|----------|-------------|----------------|--------------|-------------------------------|-------------------------|---------------|-----------------------------------|--------------------------------|
| 5 h |          | 15.5        | 50             | 35.5         | 5                             | 0                       | 0             | 3                                 | 200                            |
| 6 h |          | 10.5        | 10             | 11.5         | 58                            | 8                       | 0.5           | 1.5                               | 200                            |
| 7 h |          | 11          | 3              | 6            | 50                            | 7                       | 21            | 2                                 | 250                            |

Prophase stages were classified as early mid and late according to the increasing degree of chromosome condensation, since the length of nuclei does not change in the absence of ATR.

Table S3

## BLAST search for Pars11 protein homologs

| Group                 | Species                          | Protein ID                          | BLASTP E-value*                     |          |
|-----------------------|----------------------------------|-------------------------------------|-------------------------------------|----------|
| Multicellular animals | <i>Homo sapiens</i>              | sp Q9Y4D8-4 HECD4_HUMAN             | 0.21                                |          |
|                       | <i>Mus musculus</i>              | sp Q8CAQ8-5 MIC60_MOUSE             | 0.12                                |          |
|                       | <i>Danio rerio</i>               | ENSDARP00000122296                  | 0.021                               |          |
|                       | <i>Drosophila melanogaster</i>   | FBpp0082802                         | 0.42                                |          |
|                       | <i>Caenorhabditis elegans</i>    | ZK430.1                             | 3.3                                 |          |
| Land plant            | <i>Arabidopsis thaliana</i>      | AT5G45610.1                         | 0.95                                |          |
| Fungi                 | <i>Saccharomyces cerevisiae</i>  | YOR237W                             | 0.12                                |          |
|                       | <i>Schizosaccharomyces pombe</i> | SPAC664.14.1:pep                    | 0.52                                |          |
| Protist               | Tetrahymena                      | <i>Tetrahymena borealis</i>         | EI9_05736.1                         | 2.31E-56 |
|                       |                                  | <i>Tetrahymena ellioti</i>          | EI7_06775.1                         | 1.79E-58 |
|                       |                                  | <i>Tetrahymena malaccensis</i>      | EIA_05075.1                         | 0        |
|                       | Other ciliates                   | <i>Paramecium tetraurelia</i>       | GSPATP00036354001                   | 0.065    |
|                       |                                  | <i>Ichthyophthirius multifiliis</i> | IMG5_094660                         | 0.17     |
|                       |                                  | <i>Oxytricha trifallax</i>          | Contig20793.0.g60 Guanylate-binding | 0.21     |
|                       | Other protists                   | <i>Stylonychia lemnae</i>           | Contig10830.g11578                  | 0.001    |
|                       |                                  | <i>Plasmodium falciparum</i>        | PF3D7_1227500                       | 0.45     |
|                       |                                  | <i>Toxoplasma gondii</i>            | TGME49_206430                       | 0.61     |
|                       |                                  | <i>Trypanosoma brucei</i>           | Tbg972.7.3660                       | 0.57     |
|                       | <i>Giardia lamblia</i>           | GL50581_1183                        | 1.9                                 |          |

\*BLASTP e-value threshold was set to 10 (default).

Figure S1

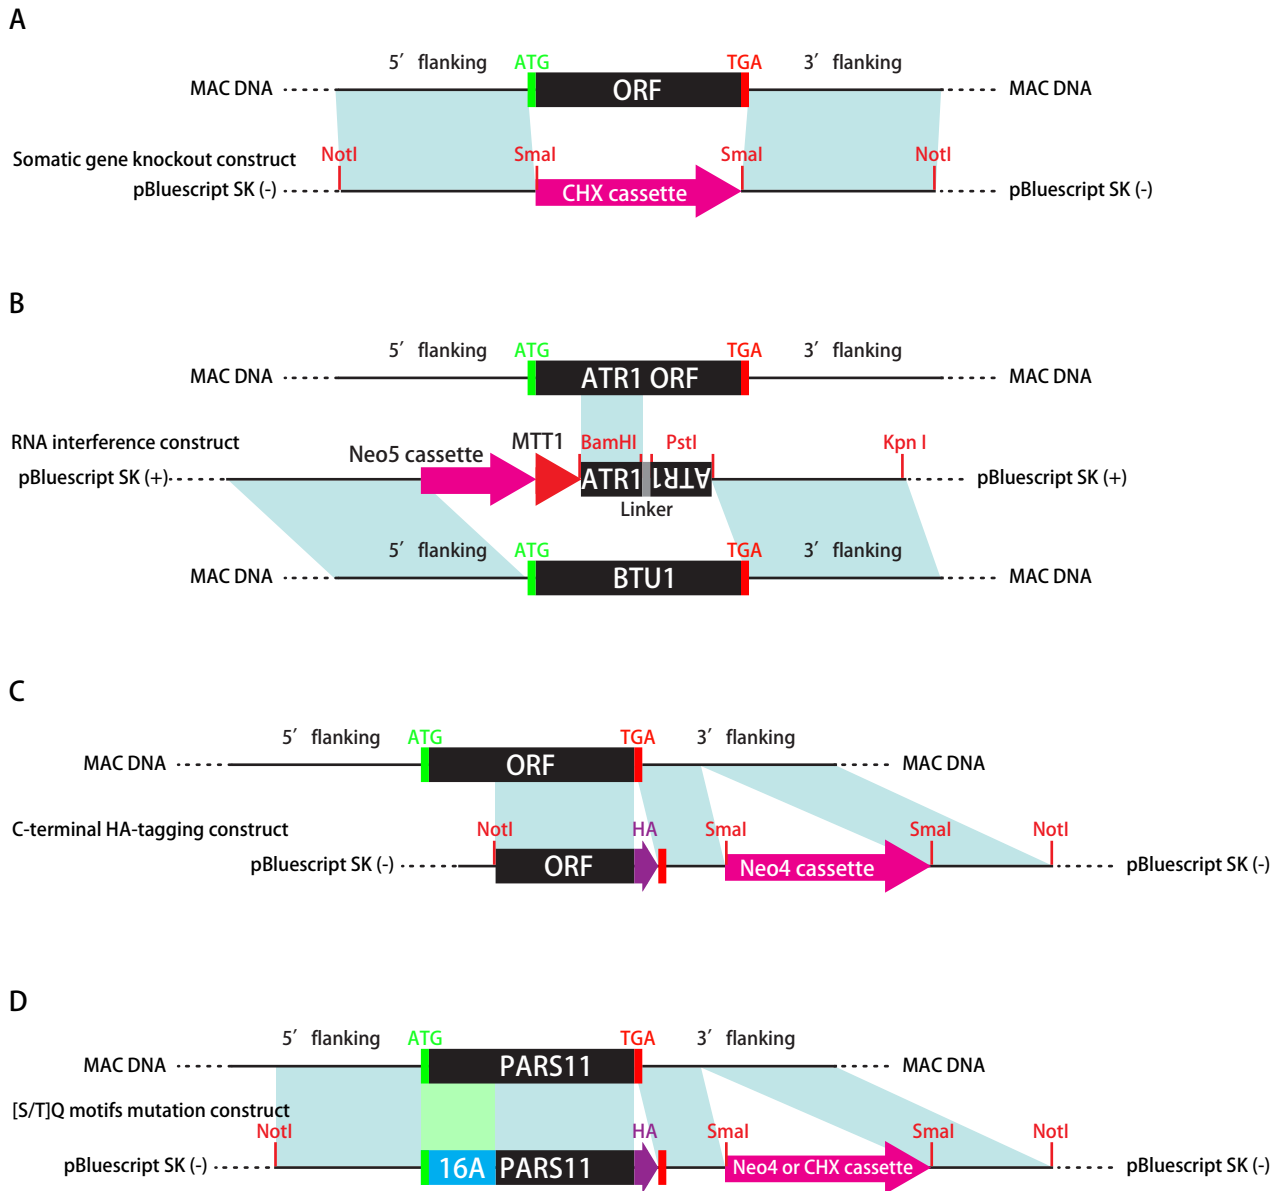

A. Diagram of the somatic gene knockout construct. DNA fragments used for homologous recombination were amplified from wild-type *Tetrahymena* genomic DNA using PCR. The NEO4 (paramomycin resistance) or CHX (cycloheximide resistance) cassette was removed from the respective plasmids by *SmaI* digestion (Gao et al. 2013, *Genes Dev.* 27: 1662-1679). DNA fragments and drug resistance cassette were then cloned into the linearized pBluescript SK(-) vector by Gibson assembly. DNA fragments in the knockout construct and their corresponding loci in the somatic genome are indicated by light blue fields.

B. Diagram of the ATR1 RNA-interference construct. A fragment of the ATR1 ORF (from 1295 bp to 1952 bp) was amplified from genomic DNA using PCR. Two copies of this fragment were inserted end-to-end behind a Cd<sup>2+</sup>-inducible MTT1 metallothionein promoter (red arrowhead) in plasmid pNeo5-RNAi (Akematsu et al. 2017, *eLife* 6: e26176). After shooting the linearized plasmid DNA into *Tetrahymena* cells, the NEO5 (paramomycin resistance) cassette and ATR1 RNA-interference cassette is integrated into the nonessential BTU1 gene locus due to flanking homologies.

C. Diagram of the C-terminal epitope tagging construct. The Pars11 C-terminal HA tagging construct was generated in a similar way to the PARS11 somatic knockout construct.

D. Diagram of the construct for the substitution of Pars11 N-terminal S/T-Q sites. This construct was generated in a similar way as the PARS11 somatic knockout construct. In this construct, all 16 serine and threonine codons within the 603 bp 5' PARS11 coding sequence were replaced by alanine codons (16A, blue box).

Figure S2

*PARS11* knockout confirmation using RT-PCR

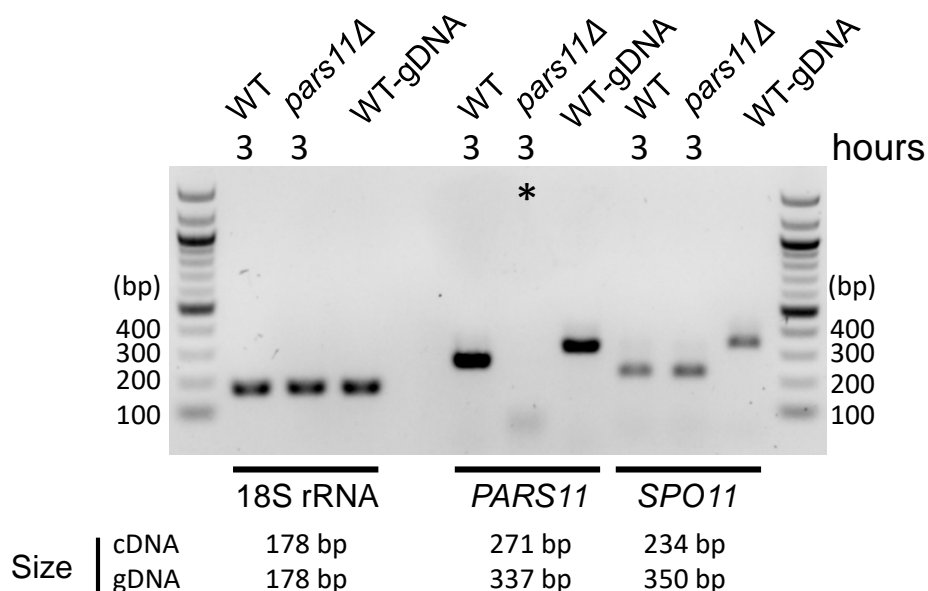

To confirm the deletion of the somatic *PARS11* gene in *pars11Δ* strains, mutants of different mating types were starved and mixed to induce conjugation. Total RNA of *pars11Δ* mating pairs was isolated at 3 hours after induction of meiosis using the TriFast reagent (PeqLab, Erlangen, Germany). cDNA was then synthesized using 1 µg of DNase I treated total RNA with the RevertAid H Minus Reverse Transcriptase kit (Thermo Fisher Scientific, Waltham, MA, USA) and random hexamers (Integrated DNA Technologies, Leuven, Belgium). cDNA synthesized from total RNA isolated from wild type 3 h after induction of meiosis, and genomic DNA (gDNA) extracted from vegetative cells of wild-type strain B2086 were used as controls. *PARS11* fragments were amplified from WT cDNA and gDNA samples using the *PARS11*-specific intron-spanning primers whereas this fragment was not amplified using *pars11Δ* cDNA (see asterisk). This result, together with the gDNA qPCR result (not shown), indicates the knockout of the *PARS11* gene from the MAC genome of *pars11Δ* mutants. *18S* rRNA/rDNA and *SPO11* specific fragments were amplified as loading control and indicator of meiosis, respectively. Primers used for PCR reactions are listed in Table S3.

Figure S3

### Predicted secondary structure of the Pars11 protein

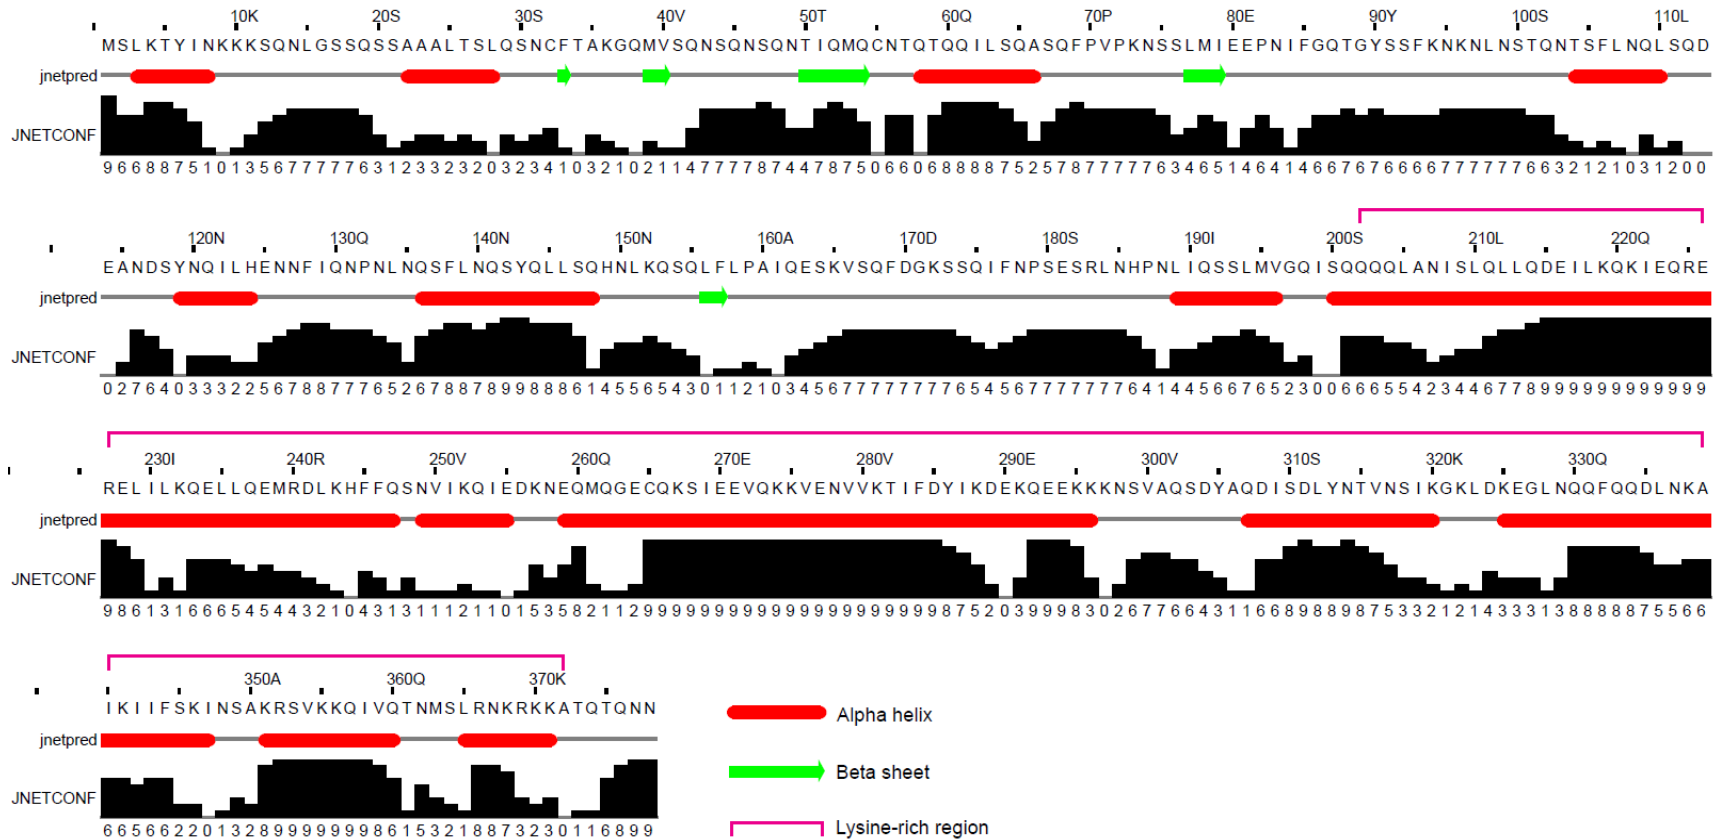

The N-terminus of Pars11 is poor in secondary structural elements, but many alpha helices are found in its C-terminal lysine-rich region. The secondary structure of the *T. thermophila* Pars11 protein was predicted by JPred4 with default settings (Drozdetskiy et al. 2015, Nucl. Acids Res. 43: W389-W394). Putative alpha helices and beta sheets are annotated as red bars and green arrows, respectively. The confidence estimate for the prediction is indicated by both the height of the black bars below the structures and the number. High values mean high confidence levels.

Figure S4

a

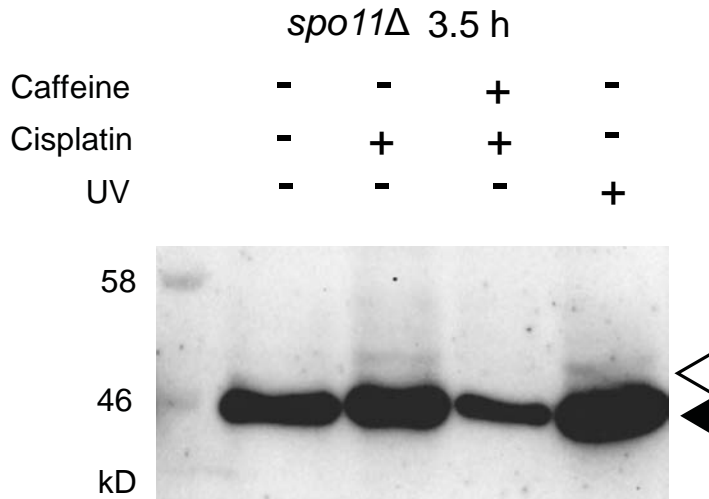

Pars11 remains nonphosphorylated (solid arrowhead) in *spo11*Δ, but phosphorylation (open arrowhead) is induced by DNA damaging agents cisplatin and UV, and is suppressed by the ATR inhibitor caffeine

b

Original version of the gel shown in Figure 4c

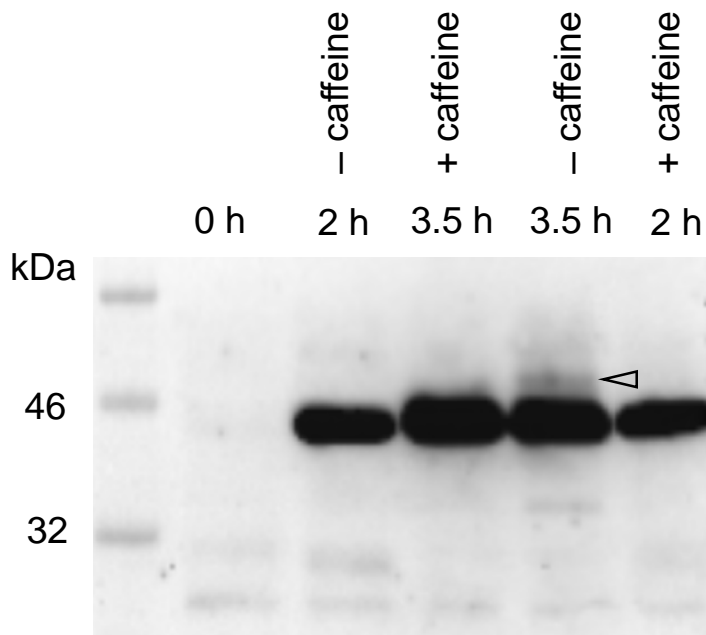

Western blot of HA-tagged Pars11 (~44 kDa). A caffeine-sensitive (i.e. possibly ATR-dependent) modified Pars11 form (open arrowhead) is present during late prophase (3.5 h after induction of meiosis).



## Figure S5

### MEME search for shared motifs in Pars11 and the Rec114 family

>Tetra\_Pars11

MSLKTYINKKKSQNLGSSQSSAAALTSLQSNCF TAKGQMV SQNSQNSQNTIQMQCNTQTQQI  
LSQASQFPVPKNSSLMIEEPNIFGQTYSSFKNKLNSTQNTSFLNQLSQDEANDSYNQILH  
ENNFIQNPNLNQSFNLQSYQLLSQHNLKQSQFLPAIQESKVSQFDGKSSQIFNPSESRLNH  
PNLIQSSLMVGQISQQQQLANISLQLLQDEILKQKIEQRERELILKQELLQEMRDLKHFFQS  
NVIKQIEDKNEQMQGECQKSIIEEVQKKVENVVKTI FDYIKDEKQEEKKKNSVAQSDYAQDIS  
DLYNTVNSIKGKLDKEGLNQQFQQDLNKAIKIIFSKINS AKRSVKKQIVQTNMSLRNKRKKA  
TQTQNN

>Yeast\_Rec114

MYEYCSVVIKKYSKYTIPSFAPNGFQSMLEPPQIDKWQHLSANCTLQFRVLLMDSRQILINV  
VLNNSTLLENIRLPLGDNQDLIQFSCKSPIISCKYISEEFGPRMLRRFQMNL PNDVEFNRTV  
VSLKNLNFVLR TARTSIAQSTITSQVQGNNGTKVCFTEGPKVSSYTNPNTQFQTQNMIMDF  
SQRYQEESERESNNR SNITLPHDSIQIAQQIWPNTDLNVVQSSQDLNTPMATQTVLGRPESL  
IVQPLEVVSQSPNTTCLPNAENKKKKVDTTSDFTSRKEIALCKTGLLETIHIPKERESQMQ  
SVTGLDATPTIIWSPGKDNTAKKNTSNKKNIDDKLTNPQKSGNTHTPDRNKEVLPNGTLNET  
RKEASPSEGLTIRVKNVNRNASRKISKRLIKEKLDKDEEFMKWVNKVETVLNKMFEK

>Elegans\_DSB-2

MSARGLKVMYYKLAEKNEAETS DVSILIDGHKRKFAVICNGIGREMVDLHYDSKKFPRIFS  
RERHLYVMFSESTSDGFRLTFGATEREQFLRIMHSLGCLLDTAIVKFSQQSSSSQPPMRRD  
STAVFNNSYNQYTSFQQASQPRVFSTIKLELSGDSCNSAFQPSQPTGFDPNQLLTIKKSSSN  
QISLSVEVADKCIQTEDLVDLLADDEYCMRKALRKMIENPSFIKAVAAAENTLQYIPQAEQE  
GLEDVTEPPINDIFFDRFHQPQLEQHDSVPED

>pombe\_rec7

MNIFPIVKYSVAEDSYTTDSSHINWSHYSDGGFTLSLTSGLLQIRQHEELIQSINLLDLWHQ  
LIPGTKEKCLTLLSRAPCMNIRAFTNNVMKRFQVKFPSDVHYMKAKVEFEKLGVLVKDAKSS  
SEKKQFNNSQSQSNNSQELSLMNNAYNKSSAQQPNNLLQPSYIPMTQTATTAVNNSTNYVNP  
APLQHVMPNAEIFSNTPLKRFRGDAGMTQMPLRSDTSIESITASQQPTWDENVVITSSPFN  
PNRNAYSYGANSQYPIIAATPLNSQTQASWVAQPENQAYANLIPSPPTTSQILPTELTEEEK  
QLRSKVLFYLKQDSFIQLCQSLERVWNKM\*

>Mus\_rec114

MSEAGNVASGLGLPGEVSQWSLKRYGRFMLLDNVGSPPGSSSEAAAAGSPTWKVFESSEESGS  
LVLTIVVSGHFFISQGTLLLEGFSLIGSKNWLKIVRRMDCLLFGTTIKNKSRMFRVQFSGES  
KEEALERCCGCVQTLAQYVTVQEPDSTTQELQQSQGPREGESQGKDPLQQGPSLTLEQHVC  
MAAGAGVLQERTSVTHRAQSILAPEKLTLAYEGSSWGTEELGPFLRLCLMDQNFPAFVEEVE  
KELKKITGLRN

>Maize\_Ph1

MRGVHRHQGTWIPASCPASLCVCHPSLPSAVPVLTISIGDVVFEHFVSILNFSWPQVTCVT  
QCPIRGSRVVFVSFCDFKQIQKFAVRFPQPCDAESFLSCVECSGSSGTMDIIPFGSDYVC  
EDSSASEYIVSNGLHHRLLDDASNLEEQCFDHTIDEPPMNYHEETDQHVLEPLSASNTSNNSA  
FPPSFNQMLKSCSIDYDQEEPCLASNHVLQEVYVLDTSHDERTAGKGMDAAGVDASILT  
YDLMARIKTYMADES FNDMLLKLDKAIDELGGMSL

## DISCOVERED MOTIFS

1.

E-value: 7.6e+001 [?](#) Site Count: 2 [?](#) Width: 6 [?](#)

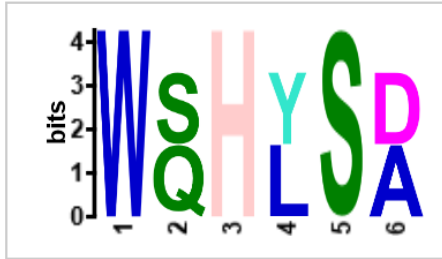

Log Likelihood Ratio: 35 [?](#) Information Content: 22.9 [?](#) Relative Entropy: 25.3 [?](#) Bayes Threshold: 9.91961 [?](#)

| Name <a href="#">?</a> | Start <a href="#">?</a> | p-value <a href="#">?</a> | Sites <a href="#">?</a>                    |
|------------------------|-------------------------|---------------------------|--------------------------------------------|
| 4. pombe_rec7          | 25                      | 2.86e-9                   | SYTDDSSHIN <b>WS</b> <b>YSD</b> GGFTLSLTSG |
| 2. Yeast_Rec114        | 37                      | 3.64e-8                   | SMLEPPQIDK <b>WQ</b> <b>LSA</b> NCTLQFRVLL |

2.

E-value: 8.5e+001 [?](#) Site Count: 2 [?](#) Width: 9 [?](#)

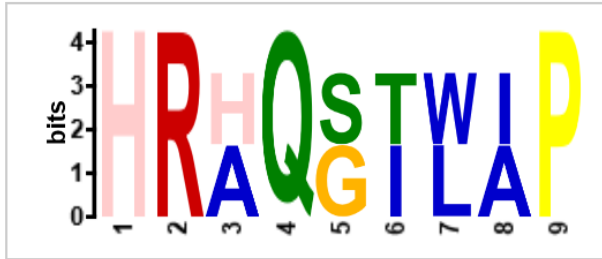

Log Likelihood Ratio: 50 [?](#) Information Content: 33.9 [?](#) Relative Entropy: 36.2 [?](#) Bayes Threshold: 9.90614 [?](#)

| Name <a href="#">?</a> | Start <a href="#">?</a> | p-value <a href="#">?</a> | Sites <a href="#">?</a>                 |
|------------------------|-------------------------|---------------------------|-----------------------------------------|
| 6. Maize_Phs1          | 5                       | 1.34e-13                  | MRGV <b>HR</b> <b>QGTWIP</b> ASCPASLCVC |
| 5. Mus_rec114          | 202                     | 1.11e-9                   | GVLQERTSVT <b>HRAQSILAP</b> EKLTLAYEGS  |

3.

E-value: 8.8e+001 [?](#) Site Count: 2 [?](#) Width: 6 [?](#)

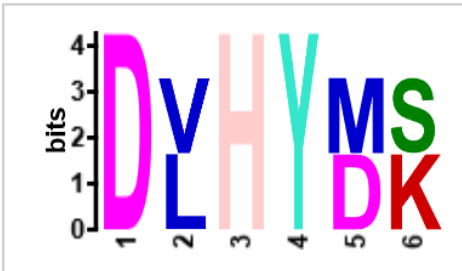

Log Likelihood Ratio: 35 [?](#) Information Content: 22.9 [?](#) Relative Entropy: 25.1 [?](#) Bayes Threshold: 9.91961 [?](#)

| Name <a href="#">?</a> | Start <a href="#">?</a> | p-value <a href="#">?</a> | Sites <a href="#">?</a>                    |
|------------------------|-------------------------|---------------------------|--------------------------------------------|
| 4. pombe_rec7          | 101                     | 4.26e-9                   | MKRFQVKFPS <b>DV</b> <b>YMK</b> AKVEFEKLG  |
| 3. Elegans_DSB-2       | 49                      | 3.17e-8                   | ICNGIGREMV <b>DL</b> <b>YDS</b> KKFPRIFSRE |

4.

E-value: 1.7e+002 [?](#) Site Count: 2 [?](#) Width: 8 [?](#)

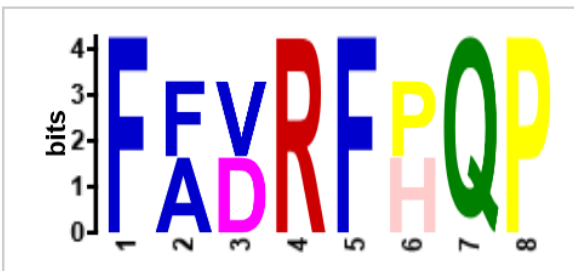

Log Likelihood Ratio: 45 [?](#) Information Content: 31.6 [?](#) Relative Entropy: 32.7 [?](#) Bayes Threshold: 9.91064 [?](#)

| Name <a href="#">?</a> | Start <a href="#">?</a> | p-value <a href="#">?</a> | Sites <a href="#">?</a>                      |
|------------------------|-------------------------|---------------------------|----------------------------------------------|
| 3. Elegans_DSB-2       | 262                     | 9.08e-12                  | DVTEPPINDI <b>FFDRF</b> <b>QP</b> QLEQHDSVPE |
| 6. Maize_Phs1          | 86                      | 1.86e-10                  | FCDKFKQIQK <b>FAVRF</b> <b>QP</b> CDAESFLSCV |

5.

E-value: 1.7e+002 Site Count: 2 Width: 8

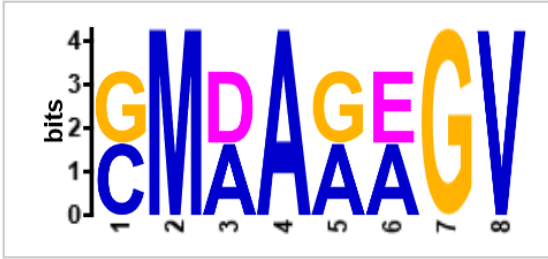

Log Likelihood Ratio: 45 Information Content: 30.6 Relative Entropy: 32.6 Bayes Threshold: 9.91064

| Name          | Start | p-value  | Sites                                 |
|---------------|-------|----------|---------------------------------------|
| 5. Mus_rec114 | 186   | 6.14e-11 | GPSLTLEQHV <b>CMAAGAGV</b> LQERTSVTHR |
| 6. Maize_Ph1  | 235   | 8.22e-11 | TSHDERTAGK <b>GMDAAGEV</b> DASILTIDLM |

6.

E-value: 2.0e+002 Site Count: 2 Width: 14

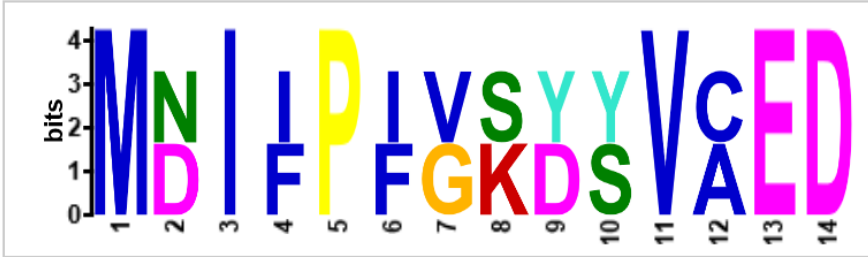

Log Likelihood Ratio: 74 Information Content: 52.5 Relative Entropy: 53.6 Bayes Threshold: 9.88341

| Name          | Start | p-value  | Sites                                     |
|---------------|-------|----------|-------------------------------------------|
| 6. Maize_Ph1  | 113   | 1.39e-18 | VECSGSSGT <b>MDIIPFGSDYVCE</b> SSASEYIVSN |
| 4. pombe_rec7 | 1     | 4.31e-15 | <b>MNIPPIVKYSVAED</b> SYTTDSSHIN          |

**MOTIF LOCATIONS**

Only Motif Sites  Motif Sites+Scanned Sites  All Sequences

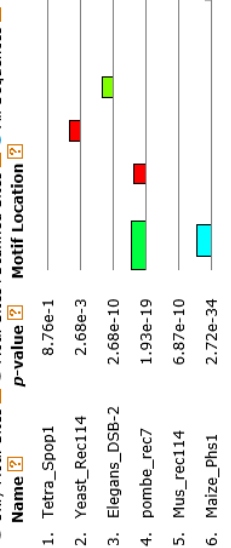

## MEME search for shared motifs shared in Pars11 and the Mei4 family

>Tetra\_Pars11

MSLKTYINKKKSQNLGSSQSSAAALTSLQSNCF TAKGQMV SQNSQNSQNTIQMCNTQTQQILSQ  
ASQFPVPKNSSLMIEEPNIFGQTGYSSFKNKNLNSTQNTSFLNQLSQDEANDSYNQILHENNFIQ  
NPNLNQSF LNQSYQLLSQHNLKQS QLFPAIQESKVSQFDGKSSQIFNPSESR LNHPLIQSSLM  
VGQISQQQLANISLQLLQDEILKQKIEQRERELILKQELLQEMRDLKHFFQSNVIKQIEDKNEQ  
MQGECQKSI EEVQKKVENNVKTI FDYIKDEKQEEKKNSVAQSDYAQDISDLYNTVNSIKGKLDK  
EGLNQQFQQDLNKAIKIIFSKINSAKRSVKKQIVQTNMSLRNKRKKATQTQNN

>Yeast\_Mei4

MSRGKLEDMEQKETSEVDWIIICFALIQSRNPTLWKRALSRKKGDVEDVGALKSEKNLKNPRENS  
KHIIYKWVAPFENGFLNNKSLFAHLEPIYNFLCQNKYKSFEDAVGLKELQSFSDVSTADINWFL  
PRYKILLKILSLKTKEIDFRGLSQVFQTLQILLVSHYSHRIDSDSSFKRTLIDVHVFNFIKFLF  
NRILLKKNQNDPKWLQNFYDQGDGKHLCDKVDYKRLCSLHFTLIYSIINIQLIKIKTNQTFEPQI  
LKYVSVLKLIEHILIIIESLIHVLRVSKHKLICINRKKAYCRVYLERELSLKKTYLKNFYSVI  
SGVPEKELGGLLKILKIVILSLETFESIEWQHLPFLEKFP AHEISLQKKRKYIQAALLITAER  
NLIARFRLSRWFNETENI

>pombe\_rec24

MNGTNTEDNSKQILIQTMYTYDSSGETLKIAIAWKIILKKPKGKNIKDYIEALRKGIEDQEHCEK  
YASTLLEPRPKTKKDVVLKNSNVTECVALKAKPFSKKIEDMDIFLLTNVHENLQEKRQTSGLAH  
LDIEYTFNGLFRFLKCTADIKLKQTKVYEGADFLRIKTLFEEIFMFLKRDCCKSPLVLRVLDLGD  
YVLDLIIITQSIMQNNANNGTGVISRKAFLEFYVFLQELIFNKLSFASVEQLEKLLDQIVKRMKI  
CFTYCKNDNPSIRLLYSECFFSYAEIYFPC LHSFDAQLSSAASKCVQILRDIITNEELQTDKQEL  
SKSAYSAPSILLIGLKDMLFPEDIS

>Mus\_MEI4

MDIQPWYLKTSKLLALALAIHSPADRSSREYTEYLASLVTQKESTWKSLEALEAEVLQLRQKL  
LLSRISSGLFKNGPDVLP T L S D Q E P T S S E N T L T L M D D S G C V L S N E Q R N E P A E L S Q H F V E S T D P P L  
L P L P L E K R P R T T L E N P L S S H M Q F F Q H L L E L K K W T E S S L K V Y L T H F E K D S S T V S D S V S Q L L D A L I  
T F Y R N P K L P F S S F W T E A V G T L A R L A S D F N L S N H I F K R C S K K L E E F E K T L L Q A I L E N N S I N R F Q V Q  
R Y V S Q S L V T L G S C S L L R K S I I S L L L S E V N S F V D D L G A I D Q D Q G I Y D V T R Y E N I F S L F W I L E Q V L Q  
Q A P Q G D R T A H M D H S I P E M Q T F L Q K H D E V I F R L S D A F P L F A F Y L W R L G V L L N S A E M E T V K N E S L P

>Arabidopsis\_Prd2

MSSSVAEANHTEKEESLR LAI AVSLLRSKFHNHQSSSSTSRCYVSSSEDALRWKQKAKERKKEII  
RLQEDLKDAESSFHRDLFPANASCKCYFFDNLGVFSGRRIGEASESRFNDVLRRLRRRFLRLARRRSR  
RKLTRSSQRLQPSEPDYEEEAHLRISIDFLELSEADSNSNFSNWSHQAVDFIFASLKKLISM  
GRNLESVEESISFMITQLITRMCTPFKGVKQLETSVGFYVQHLIRKLGSEPFIGQRAIFAISQ  
RISILAENLLFMDPFDESFPMEDECMFILIQLIEFLICDYLLPWAENEAFDNVMFEEWIASVVHA  
RKAVKALEERNGLYLLYMDRVTGELAKRVGQITSFREVEPAILDKILAYQEIE

## DISCOVERED MOTIFS

1.

E-value: 1.8e+001 [?](#) Site Count: 2 [?](#) Width: 6 [?](#)

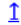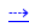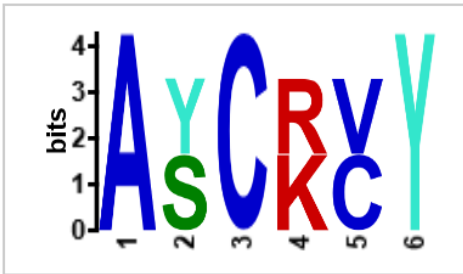

Log Likelihood Ratio: 36 [?](#) Information Content: 22.9 [?](#) Relative Entropy: 26.3 [?](#) Bayes Threshold: 9.87344 [?](#)

| Name <a href="#">?</a> | Start <a href="#">?</a> | p-value <a href="#">?</a> | Sites <a href="#">?</a>             |
|------------------------|-------------------------|---------------------------|-------------------------------------|
| 5. Arabidopsis_Prd2    | 87                      | 4.46e-9                   | SFHRDLFPAN <b>ASCKRY</b> FPDNLGVPSG |
| 2. Yeast_Mei4          | 301                     | 7.31e-9                   | HKLICINRKK <b>AYCRVY</b> LERELSLKKT |

2.

E-value: 1.8e+001 [?](#) Site Count: 2 [?](#) Width: 9 [?](#)

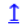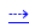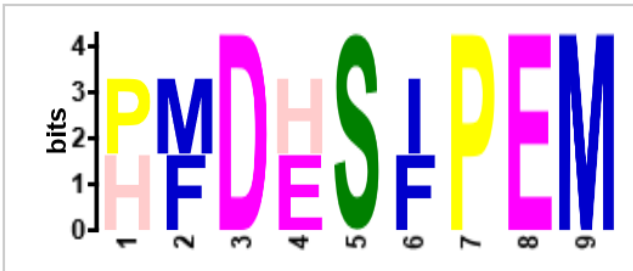

Log Likelihood Ratio: 52 [?](#) Information Content: 34.9 [?](#) Relative Entropy: 37.6 [?](#) Bayes Threshold: 9.86186 [?](#)

| Name <a href="#">?</a> | Start <a href="#">?</a> | p-value <a href="#">?</a> | Sites <a href="#">?</a>                |
|------------------------|-------------------------|---------------------------|----------------------------------------|
| 5. Arabidopsis_Prd2    | 274                     | 2.46e-12                  | ILAENLLFMD <b>FMDESIPEM</b> DECMFILIQL |
| 4. Mus_MEI4            | 335                     | 2.46e-12                  | QQAPQGDRTA <b>HMDHSIPEM</b> QTFLOKHDEV |

3.

E-value: 4.3e+001 [?](#) Site Count: 2 [?](#) Width: 9 [?](#)

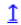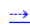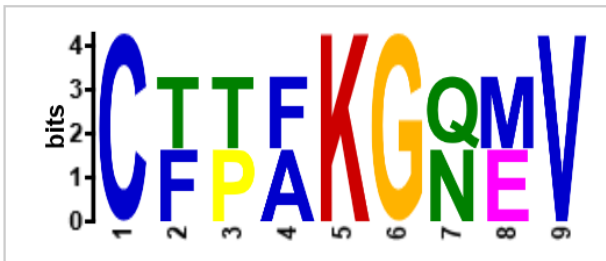

Log Likelihood Ratio: 51 [?](#) Information Content: 33.9 [?](#) Relative Entropy: 36.8 [?](#) Bayes Threshold: 9.86186 [?](#)

| Name <a href="#">?</a> | Start <a href="#">?</a> | p-value <a href="#">?</a> | Sites <a href="#">?</a>                |
|------------------------|-------------------------|---------------------------|----------------------------------------|
| 5. Arabidopsis_Prd2    | 218                     | 2.37e-12                  | FMITQLITRM <b>CTFKGMV</b> KQLETSGVGY   |
| 1. Tetra_Spop1         | 32                      | 6.12e-12                  | AAALTSLSQSN <b>CFTAKGMV</b> SQNSQNSQNT |

4.

E-value: 1.3e+002 [?](#) Site Count: 2 [?](#) Width: 11 [?](#)

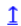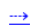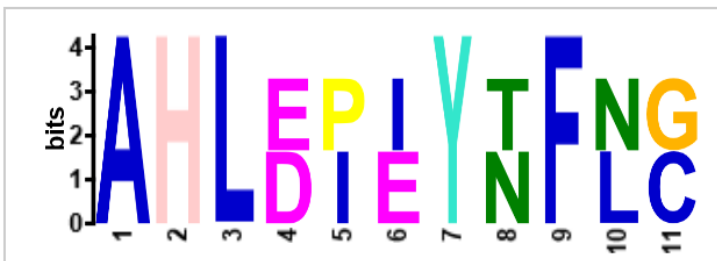

Log Likelihood Ratio: 59 [?](#) Information Content: 41.5 [?](#) Relative Entropy: 42.3 [?](#) Bayes Threshold: 9.85409 [?](#)

| Name <a href="#">?</a> | Start <a href="#">?</a> | p-value <a href="#">?</a> | Sites <a href="#">?</a>                 |
|------------------------|-------------------------|---------------------------|-----------------------------------------|
| 3. pombe_rec24         | 129                     | 8.82e-14                  | QEKRTSGSL <b>AHLDIYTFNG</b> LFRFLKCTAD  |
| 2. Yeast_Mei4          | 87                      | 8.82e-14                  | NGFLNNSLFL <b>ALEPIYNFLC</b> QNKYKSFEDA |

5.

E-value: 1.6e+002 [?](#) Site Count: 2 [?](#) Width: 6 [?](#)

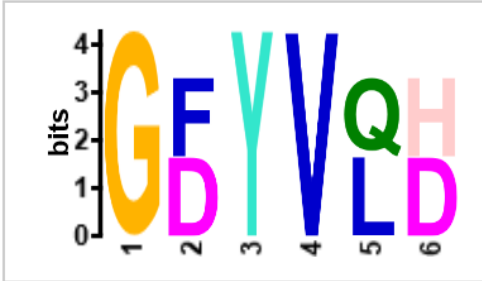

Log Likelihood Ratio: 34 [?](#) Information Content: 22.9 [?](#) Relative Entropy: 24.8 [?](#) Bayes Threshold: 9.87344 [?](#)

| Name <a href="#">?</a> | Start <a href="#">?</a> | p-value <a href="#">?</a> | Sites <a href="#">?</a>                                                    |
|------------------------|-------------------------|---------------------------|----------------------------------------------------------------------------|
| 5. Arabidopsis_Prd2    | 234                     | 1.37e-8                   | NEVKQLETSV <b>G</b> <b>P</b> <b>Y</b> <b>V</b> <b>Q</b> LIRKLGSEPF         |
| 3. pombe_rec24         | 194                     | 2.18e-8                   | PLVLRRLVEL <b>G</b> <b>D</b> <b>Y</b> <b>V</b> <b>L</b> <b>D</b> LIITQSIMQ |

6.

E-value: 1.5e+002 [?](#) Site Count: 2 [?](#) Width: 6 [?](#)

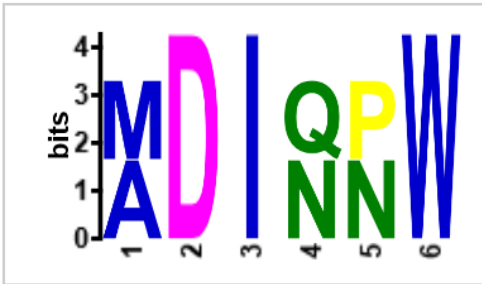

Log Likelihood Ratio: 36 [?](#) Information Content: 22.9 [?](#) Relative Entropy: 25.7 [?](#) Bayes Threshold: 9.87344 [?](#)

| Name <a href="#">?</a> | Start <a href="#">?</a> | p-value <a href="#">?</a> | Sites <a href="#">?</a>                                                     |
|------------------------|-------------------------|---------------------------|-----------------------------------------------------------------------------|
| 4. Mus_MEI4            | 1                       | 1.98e-9                   | <b>M</b> <b>D</b> <b>I</b> <b>Q</b> <b>P</b> <b>W</b> YLKTSKLALA            |
| 2. Yeast_Mei4          | 123                     | 1.82e-8                   | LQSFSDKVST <b>A</b> <b>D</b> <b>I</b> <b>N</b> <b>N</b> <b>W</b> FLPRYKILLK |

**MOTIF LOCATIONS**

Only Motif Sites [?](#)  Motif Sites+Scanned Sites [?](#)  All Sequences [?](#)

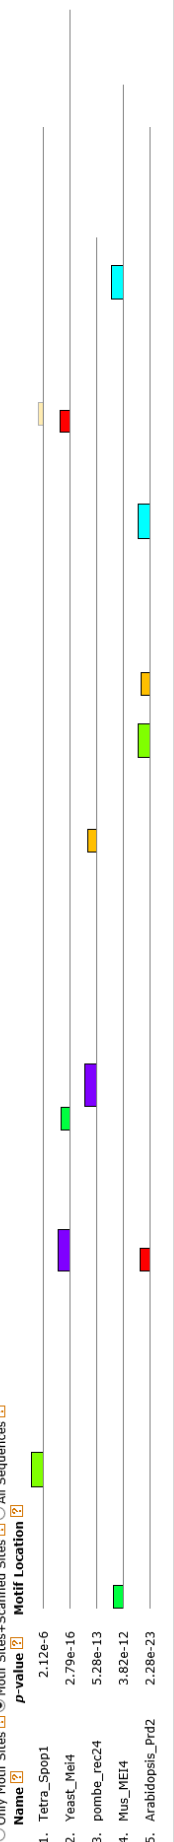

Figure S6

## Structural features of *Tetrahymena* Pars11 and budding yeast RMM proteins and Hop1

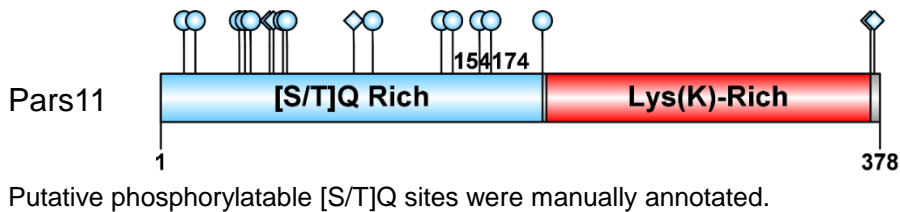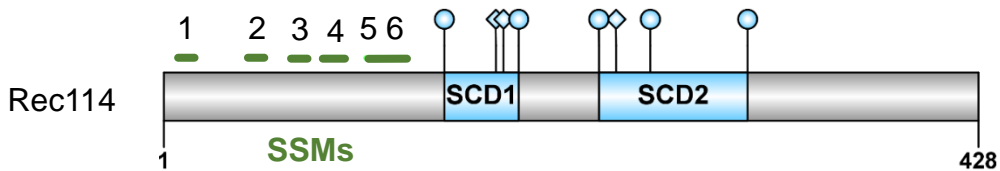

SCDs (S/T-Q cluster domains) are defined as regions where three or more SQ or TQ motifs are found within a tract of 100 residues or less (Traven and Heierhorst 2005, *BioEssays* 27: 397-407). SSMs, short signature sequence motifs (Tessé et al. 2017, *Genes Dev.* 31: 1880-1893). Phosphorylation sites (S/T-Q) annotated according to Carballo et al, 2013, *PLoS Genet.* 9, e1003545.

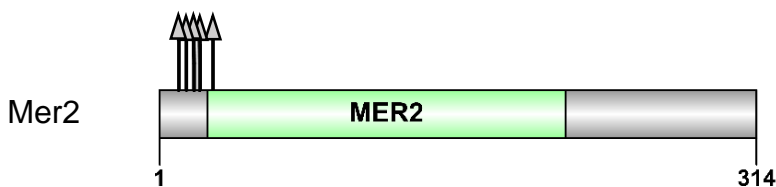

Cdc7-dependent Ser phosphorylation sites ( $\Delta$ ) according to Sasanuma et al. 2008, *Nucl. Acids Res.* 36: 984-997. Domain annotated according to the NCBI's Conserved Domain Database.

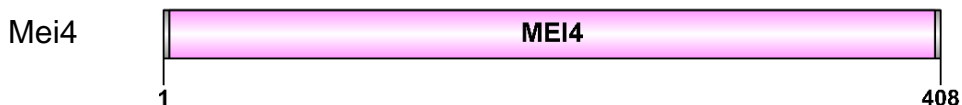

Domain annotated according to the NCBI's Conserved Domain Database.

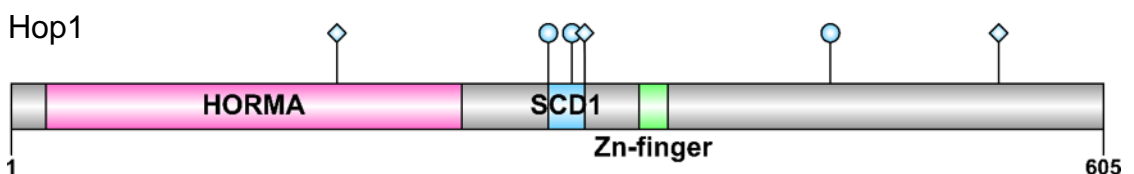

Phosphorylation sites (S/T-Q) were annotated according to Carballo et al. 2008, *Cell* 132: 758-770. The HORMA Domain was annotated according to the NCBI's Conserved Domain Database. The Zinc finger was annotated according to the Uniprot database. Domain annotated according to the NCBI's Conserved Domain Database.

Of the yeast RMM proteins, Rec114 most closely resembles Pars11 due to the presence of highly clustered S/T-Q motifs. No other similarities are found.

Diagrams were generated with the Illustrator for Biological Sequences (IBS) (Liu et al. 2015, *Bioinformatics* 31: 3359-3361).

Figure S7

### *Tetrahymena* Pars11 alignments

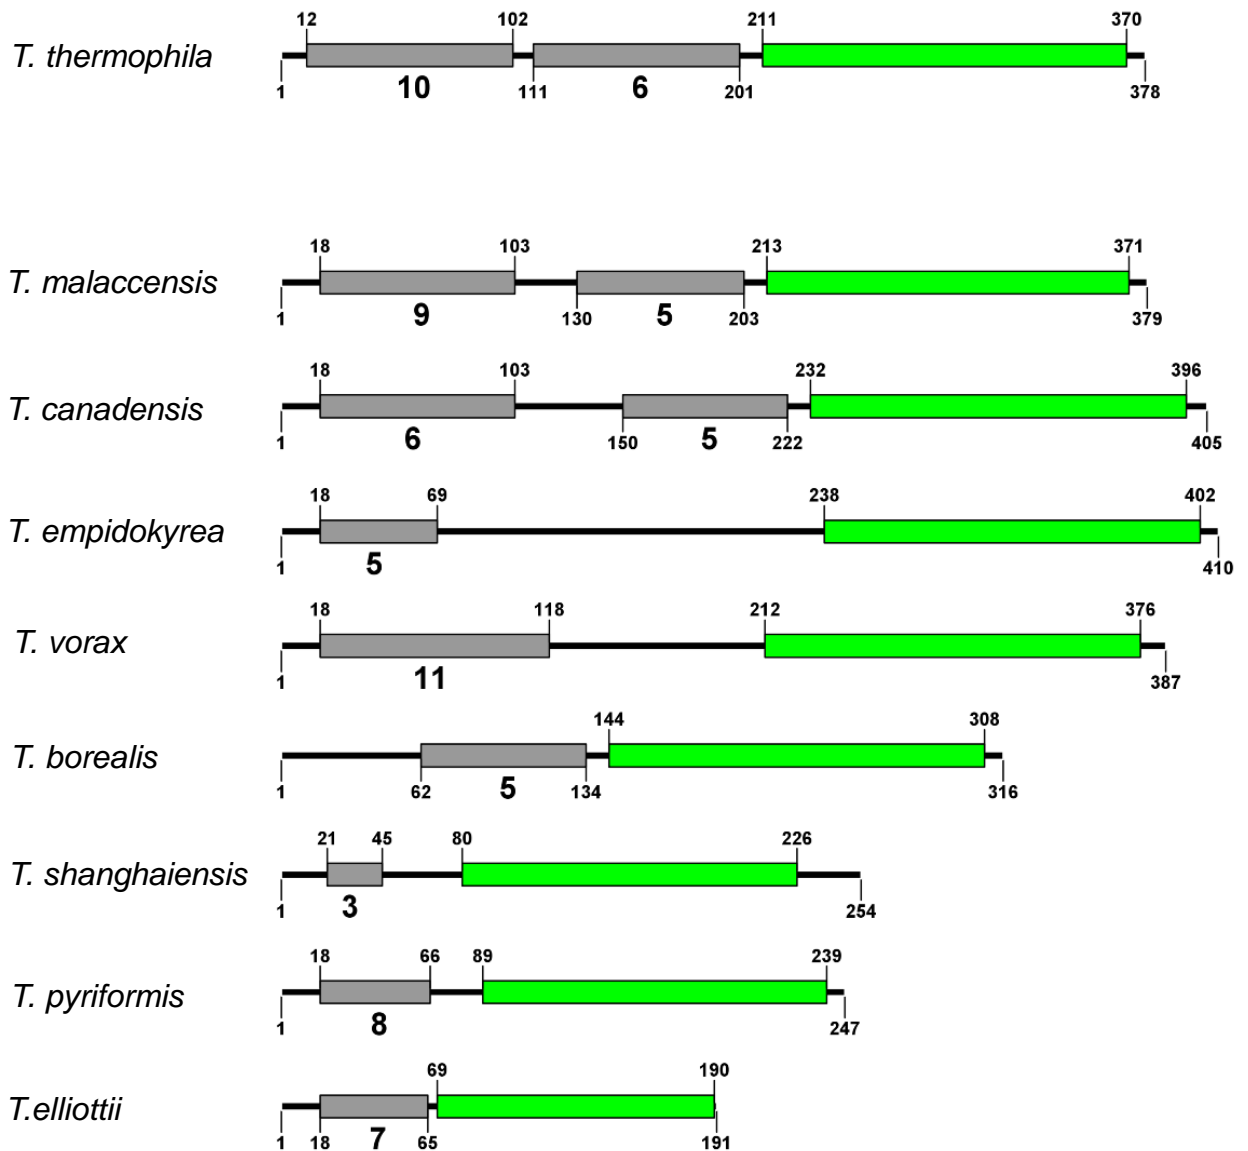

The S/T-Q cluster domains are defined as regions where three or more SQ or TQ motifs are found within a tract of 100 residues or less. Gray bars indicate the N-terminal S/T-Q clusters, green bars the conserved Lys-rich C-terminus. Numbers under the S/T-Q clusters indicate the number of S/T-Q motifs. Diagrams were generated with the Illustrator for Biological sequences (Liu et al. 2015, Bioinformatics 31: 3359-3361).



Figure S7 continued

```

1      10      20      30      40      50      60      70
T.the/1-378 MSLKTYINKKK..SQNLG...SSQSSAALTSLQSNCF...AKGMV...SQNSQNSQN...TI...QM...QCNTQTQ...Q.....LTSQASQ...QFP...VPKNSSLMI
T.mal/1-379 MSLKTYINKKK..NQNLG...SSQSSAVLSSLQSNLSL...AKGMAA...QNSQNSQN...TIQ...QM...QSNTQTQ...Q.....ESTQTS...QFP...VLKNSTVMI
T.can/1-405 MSLKTFINKYK..NQNTK...SSQSSAASFSTISSTSF...APKGVV...PNSQNSQN...FSQ...TSTLFSQQCI...SFILYCTITLTF...TYFNL...TIVPSSAQKNQYTI
T.epi/1-410 MSLKNFIKGYK..QQSNK...SSQSSGAFSNI...STNSFAS...SKPQSQNNNN...SYHKV...VNSQQT...PA...SKPQSQNNNN...SYHKV...VNSQQT...PA...SFLSQNLPS...SQRNPSLQL
T.vor/1-387 MSLKTFINKYK..NQNQK...SSQSSAATFSSISANGFS...TKGQA...SSNSQNTSN...QFS...QKMNSQQT...TTQ...P...TYSQNAS...SQFSASNNN...
T.bor/1-316 KNQYTIIDEGRIASQNLN...KSYQV...NKQAS...TYSKSTSI...P...NSFLQDQ...P...TYEN...
T.sha/1-254 MSLQNFIQKYR..HSNNKQSS...SSQSS...TGS...FSNIS...NTFAS...QT...NQS...TQP...VQ...QQQQQQ...P...YFQKT...NNP...
T.pyr/1-247 MSLKTFINKYK..NQNMK...SSQSSGASFSQISTAGFS...GK...P...HG...SQNSQNSQS...PFQ...K...VNSQQT...P...VYSQSN...FL...
T.ell/1-191 MSLKTYINKKK..NQNLG...SSQSSAALFSSLQPN...NF...AKC...II...SQNSQSSQN...TL...QM...SSNTQTQ...Q...VLTQ...
consensus>60 mslktfink.k..nqn...ssqss.a.fs...n.f.k.q...qnsqn.qn...q...qtq...iy.q

```

```

80      90      100     110     120     130     140     150     160
T.the/1-379 EEPNIFGQTGYSSFKNKNLNST...QNTSFLNQLSQDEANDSY...NQILH...ENNFIQNP...LNQS...FLN...QSYQL...L.SQHNLK...QS...QL...FL...PA
T.mal/1-380 EEPSILGQNCCHSQYMNKNLNST...QNTSIFNQFPQDEANYSY...NQILN...ENNFSQIP...LNQS...YVNQ...QSYQL...L.TQHNLK...QS...QL...FL...PT
T.can/1-406 DEGRIASQNLNKSQVNVKQASTYNSKSTSI...PNSFLQDQPTYEN...QIENN...DSFFIQSQ...LNNS...AHMQ...NLNG...NLV...QNLN...QS...QL...FL...PT
T.epi/1-411 MQDEMKSPECFQSVSLKMAQPNPKQNNMNQTV...AEDINDTNTFNQLDSSNR...ESFYIQAPL...LNNS...GQTL...LSSFNNPYNQNNISNG...S...NLN...QS...QL...LQ...T
T.vor/1-388 .....NNNNSFRNNNNQPSSTYQ...TQ...SLSQ...FLQDDH...QDTQM...QS...QNDIK...ESFYIQNTS...LTNS...PNQY...QOYSNG...IYP...S...NLN...QS...QL...Y...LPT
T.bor/1-317 .....QIENN...DSFFIQSQ...LNNS...AHMQ...NLNG...NLV...QNLN...QS...QL...FL...PT
T.sha/1-255 .....NI...F...SR...QL...LV...P
T.pyr/1-248 .....NI...F...SR...QL...LV...P
T.ell/1-192 .....NI...F...SR...QL...LV...P
consensus>60 .....q.e.f.q...l.n...q...q.nl.qsq.l.lp.

```

```

170     180     190     200     210     220     230     240
T.the/1-378 IQESKVSQFDGKSSQIFNPS...ESRLNHP...NLIQSSLMV...GQIS...QQQL...ANISL...QLLQDEIL...KQKIEQ...RE...RE...LI...LKQEL...LQE...MRDLKH...FFQ
T.mal/1-379 IQESKVSQFDGKSSQIFNPS...ESRLNNT...NLQSNLIV...GQIS...QQQL...ANFSL...QFLQDEIL...KQKIEQ...RE...RE...LI...LKQEL...LLE...MRDLKQ...FFQ
T.can/1-405 IQESKVTMFDGGQSQVYYHQ...EPRLIKP...NLQSNVYLS...QFS...QQQM...ATIQF...QILQDEIL...KQKVEQ...KER...ELL...LKQEL...LSE...MKDLKQ...YFK
T.epi/1-410 NMESSLG...YCGQMN...TQINPN...ESRLIRP...NLQSCIS...IGQLG...QH...SINGNYNCN...NYQNN...QYQ...QMLQEEM...KCRFEQ...QQR...ENH...LKI...EL...YE...MKKIK...TYFK
T.vor/1-387 IQESKVSQFDGGSQS...FFF...P...DSRI...MKP...SL...QSAI...ILG...Q...F...P...Q...SHV...SNTQF...QLIQEEL...KTKIEQ...KER...RF...Q...MKQEL...LSE...MKDLK...DYFR
T.bor/1-316 IQESKVTMFDGGSQS...VYYHQ...EPRLIKP...NLQSNVYLS...QFS...QQQM...ATIQF...QLLQDEIL...KQKVEQ...KER...ELL...LKQEL...LSE...MKDLK...QYFK
T.sha/1-254 TKNT...KQL...ANFQI...SILG...VEQ...EFL...SAT...RM...KEL...K...SYFK
T.pyr/1-247 .....KQL...ANFQI...SILG...VEQ...EFL...SAT...RM...KEL...K...SYFK
T.ell/1-191 .....KQL...ANFQI...SILG...VEQ...EFL...SAT...RM...KEL...K...SYFK
consensus>60 ..es...f...e.r...l.qs...q.q...q.lqde...k...eq.ere...lkqelL.e...MkdIK.%f.

```

Figure S7 continued

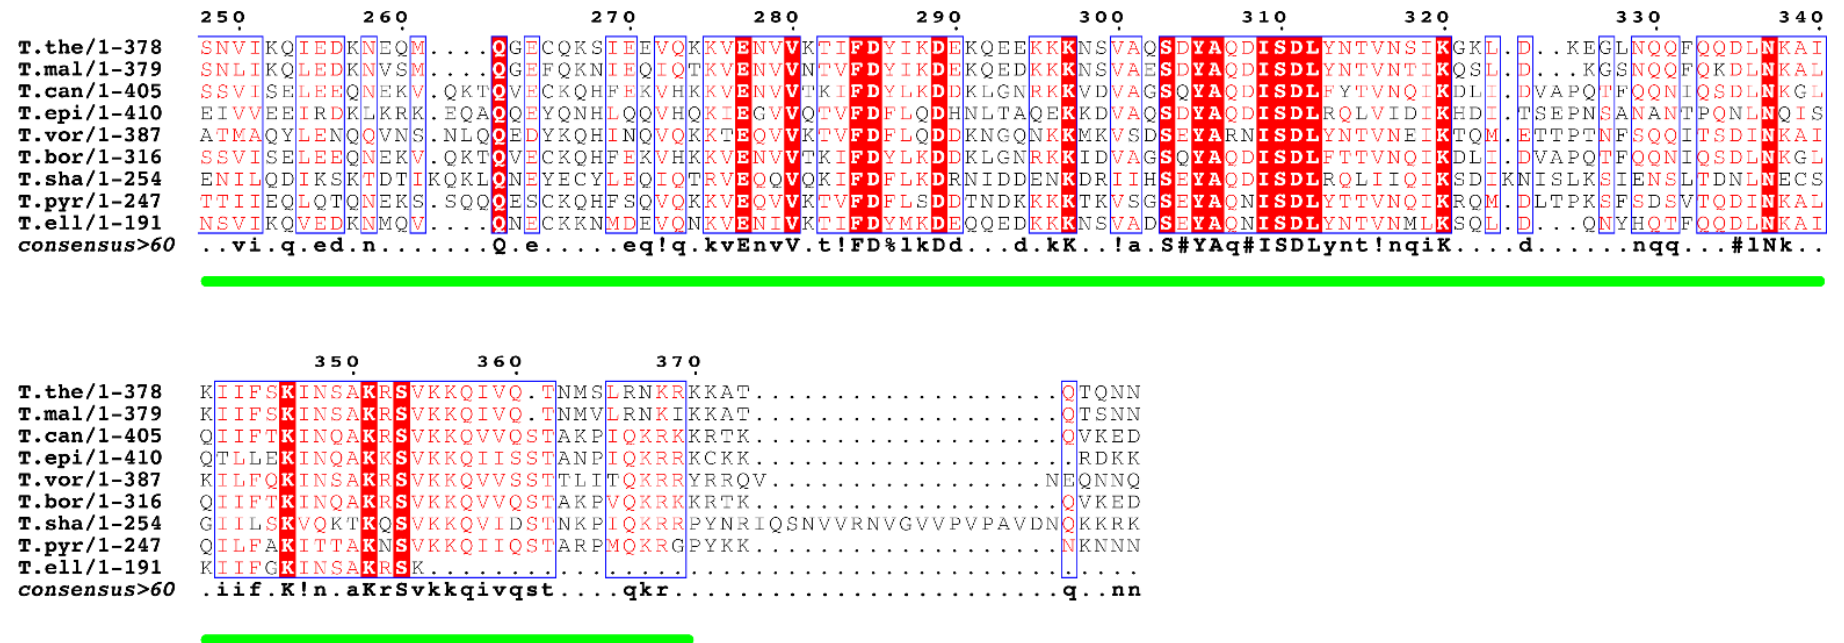

Orthologs of *T. thermophila* Pars11 proteins were identified by BLASTP or tBLASTn searches against proteomes or draft genomes of other *Tetrahymena* species in two databases (<http://ciliate.org> and <http://ciliate.ihb.ac.cn>). Protein sequences were aligned using MUSCLE (Edgar 2004, Nucl. Acids Res. 32: 1792-1797) and colored according to amino acid sequence similarity using Esript 3.0 (Robert and Gouet 2014, Nucl. Acids Res. 42 W1: W320-W324). Regions with >60% similarity are framed in blue. Identical residues are boxed in red, and similar residues are colored in red. The conserved C-terminal region was green underlined. The accession numbers of these proteins are: EIA\_05075.1 (*Tetrahymena malaccensis*), TVORAX00043590 (*Tetrahymena vorax*), TSP00031430 (*Tetrahymena canadensis*), TEPIDO00188250 (*Tetrahymena empidokyrea*), TSHANG00212290 (*Tetrahymena shanghaiensis*), EI7\_06775.1 (*Tetrahymena ellioti*). Pars11 coding genes in *Tetrahymena borealis* and *Tetrahymena pyriformis* were incorrectly annotated, hence we corrected their annotation manually according to their genome sequences.
